# Supplementary material for: Ex vivo instability of lipids in whole blood: preanalytical recommendations for clinical lipidomics studies
Source: PubMed Central journal article supplement (PMC10208886; doi:10.1016/j.jlr.2023.100378), 2023-04-21
Supplement: mmc3.pdf [file mmc3.pdf]

## Overall study design

|                                         |                                                                                                                                                                  |          |    |
|-----------------------------------------|------------------------------------------------------------------------------------------------------------------------------------------------------------------|----------|----|
| Title of the study                      | Ex vivo instability of lipids in whole blood – pre-analytical recommendations for clinical lipidomics studies                                                    |          |    |
| Principle investigator                  | Guowang Xu, Rainer Lehmann                                                                                                                                       |          |    |
| Institution                             | CAS Key Laboratory of Separation Science for Analytical Chemistry, Dalian Institute of Chemical Physics, Chinese Academy of Sciences (CAS), Dalian 116023, China |          |    |
| Corresponding Email                     | xugw@dicp.ac.cn                                                                                                                                                  |          |    |
| Document creation date                  | 11/30/2022                                                                                                                                                       | Clinical | No |
| Is the workflow targeted or untargeted? | Untargeted                                                                                                                                                       |          |    |

## Lipid extraction

|                   |                |                                                 |      |
|-------------------|----------------|-------------------------------------------------|------|
| Extraction method | 2-phase system | 2-phase system                                  | MTBE |
| pH adjustment     | None           | Were internal standards added prior extraction? | Yes  |

## Analytical platform

|                                                                        |               |                                                                        |                 |
|------------------------------------------------------------------------|---------------|------------------------------------------------------------------------|-----------------|
| Number of separation dimensions                                        | One dimension | Ion source                                                             | ESI             |
| Separation Type 1                                                      | LC            | MS Level                                                               | MS1, MS2        |
| Separation Mode 1                                                      | RP            | Mass resolution for detected ion at MS1                                | High resolution |
| Separation window (1) for lipid analyte selection ( $\pm$ ) in minutes | 0.2           | Resolution at m/z 200 at MS1                                           | 140000          |
| RT verified by standard                                                | No            | Mass accuracy in ppm at MS1                                            | 5               |
| CCS verified by standard                                               | No            | Mass window for precursor ion isolation (in Da total isolation window) | 2               |
| Separation of isobaric/isomeric interferece confirmed                  | No            | Mass resolution for detected ion at MS2                                | High resolution |
| Model for separation prediction                                        | No            | Resolution at m/z 200 at MS2                                           | 70000           |
| MS type                                                                | Orbitrap      | Mass accuracy in ppm at MS2                                            | 10              |
| MS vendor                                                              | Thermo        |                                                                        |                 |

## Quality control

|                |                 |                   |             |
|----------------|-----------------|-------------------|-------------|
| Blanks         | Yes             | Quality control   | Yes         |
| Type of Blanks | Injection blank | Type of QC sample | Sample pool |

## Method qualification and validation

|                                                      |     |                     |      |
|------------------------------------------------------|-----|---------------------|------|
| Method validation                                    | Yes | Precision           | Yes  |
| Lipid recovery                                       | Yes | Accuracy            | No   |
| Dynamic quantification range                         | Yes | Guidelines followed | None |
| Limit of quantitation (LOQ)/Limit of detection (LOD) | Yes |                     |      |

## Reporting

|                                                 |     |                 |                     |
|-------------------------------------------------|-----|-----------------|---------------------|
| Are reported raw data uploaded into repository? | Yes | Summary data    | Quantification data |
| Are metadata available?                         | No  | Raw data upload | No                  |

## Sample Descriptions

### EDTA whole blood-preanalytical study (various preanalytical handling conditions for research purposes) / Human / Plasma

|                                      |                                                                |                                      |      |
|--------------------------------------|----------------------------------------------------------------|--------------------------------------|------|
| Provided information                 | Freeze-thaw cycles, Storage time (month), Time to freeze (min) | Storage time (month)                 | 9    |
| Temperature handling original sample | 4-8 °C                                                         | Freeze-thaw cycles                   | 0    |
| Instant sample preparation           | No                                                             | Additives                            | None |
| Time to freeze (min)                 | 10                                                             | Were samples stored under inert gas? | No   |
| Snap freezing in liquid N2           | No                                                             | Additional preservation methods      | No   |
| Storage temperature                  | -80 °C                                                         | Biobank samples                      | No   |

## Lipid Class Descriptions

### Lipid class FA[M-H]- / Lipid identification

|                                 |                         |                                        |          |
|---------------------------------|-------------------------|----------------------------------------|----------|
| Lipid class                     | FA                      | MS1 verified by standard               | No       |
| MS Level                        | MS1                     | Background check at MS1                | Yes      |
| Identification level            | Molecular species level | Check isomer overlap                   | No       |
| Polarity mode                   | Negative                | Lipid Identification Software          | Xcalibur |
| Type of negative (precursor)ion | [M-H]-                  | Nomenclature for intact lipid molecule | Yes      |
| Isotope correction at MS1       | No                      |                                        |          |

### Lipid class FA[M-H]- / For additional separation methods/analytical dimension

|                            |                          |                               |             |
|----------------------------|--------------------------|-------------------------------|-------------|
| Quantitative               | Yes                      | Limit of quantification       | No          |
| Internal lipid standard(s) | FA 22:0-d4               | Normalization to reference    | No          |
| Type of quantification     | Internal standard amount | Lipid Quantification Software | TraceFinder |
| Response correction        | No                       | Batch correction              | No          |
| Type I isotope correction  | No                       |                               |             |

### Lipid class DG[M+Na]<sup>+</sup> / Lipid identification

|                                 |                     |                                        |             |
|---------------------------------|---------------------|----------------------------------------|-------------|
| Lipid class                     | DG                  | MS1 verified by standard               | No          |
| MS Level                        | MS1                 | Background check at MS1                | Yes         |
| Identification level            | Species level       | Check isomer overlap                   | No          |
| Polarity mode                   | Positive            | Lipid Identification Software          | LipidSearch |
| Type of positive (precursor)ion | [M+Na] <sup>+</sup> | Nomenclature for intact lipid molecule | Yes         |
| Isotope correction at MS1       | No                  |                                        |             |

### Lipid class DG[M+Na]<sup>+</sup> / For additional separation methods/analytical dimension

|                            |                          |                               |             |
|----------------------------|--------------------------|-------------------------------|-------------|
| Quantitative               | Yes                      | Limit of quantification       | No          |
| Internal lipid standard(s) | DG (15:0/18:1)           | Normalization to reference    | No          |
| Type of quantification     | Internal standard amount | Lipid Quantification Software | TraceFinder |
| Response correction        | No                       | Batch correction              | No          |
| Type I isotope correction  | No                       |                               |             |

### Lipid class DG[M+NH4]<sup>+</sup> / Lipid identification

|                                 |                      |                                        |             |
|---------------------------------|----------------------|----------------------------------------|-------------|
| Lipid class                     | DG                   | MS1 verified by standard               | No          |
| MS Level                        | MS1, MS2             | MS2 verified by standard               | No          |
| Identification level            | Species level        | Background check at MS1                | Yes         |
| Polarity mode                   | Positive             | Background check at MS2                | No          |
| Type of positive (precursor)ion | [M+NH4] <sup>+</sup> | Check isomer overlap                   | No          |
| How many fragments used for ID  | 1 fragment           | Lipid Identification Software          | LipidSearch |
| Fragment ion 1                  | NL[FA-H+NH4]         | Nomenclature for intact lipid molecule | Yes         |
| Isotope correction at MS1       | No                   | Nomenclature for fragment ions         | N/A         |
| Isotope correction at MS2       | No                   |                                        |             |

### Lipid class DG[M+NH4]<sup>+</sup> / For additional separation methods/analytical dimension

|                            |                          |                               |             |
|----------------------------|--------------------------|-------------------------------|-------------|
| Quantitative               | Yes                      | Limit of quantification       | No          |
| Internal lipid standard(s) | DG (15:0/18:1)           | Normalization to reference    | No          |
| Type of quantification     | Internal standard amount | Lipid Quantification Software | TraceFinder |
| Response correction        | No                       | Batch correction              | No          |
| Type I isotope correction  | No                       |                               |             |

### Lipid class TG[M+Na]<sup>+</sup> / Lipid identification

|                                 |                     |                                        |             |
|---------------------------------|---------------------|----------------------------------------|-------------|
| Lipid class                     | TG                  | MS1 verified by standard               | No          |
| MS Level                        | MS1                 | Background check at MS1                | Yes         |
| Identification level            | Species level       | Check isomer overlap                   | No          |
| Polarity mode                   | Positive            | Lipid Identification Software          | LipidSearch |
| Type of positive (precursor)ion | [M+Na] <sup>+</sup> | Nomenclature for intact lipid molecule | Yes         |
| Isotope correction at MS1       | No                  |                                        |             |

## Lipid class TG[M+Na]<sup>+</sup> / For additional separation methods/analytical dimension

|                            |                          |                               |             |
|----------------------------|--------------------------|-------------------------------|-------------|
| Quantitative               | Yes                      | Limit of quantification       | No          |
| Internal lipid standard(s) | TG<br>(15:0/15:0/15:0)   | Normalization to reference    | No          |
| Type of quantification     | Internal standard amount | Lipid Quantification Software | TraceFinder |
| Response correction        | No                       | Batch correction              | No          |
| Type I isotope correction  | No                       |                               |             |

## Lipid class TG[M+NH<sub>4</sub>]<sup>+</sup> / Lipid identification

|                                 |                                   |                                        |             |
|---------------------------------|-----------------------------------|----------------------------------------|-------------|
| Lipid class                     | TG                                | Isotope correction at MS2              | No          |
| MS Level                        | MS1, MS2                          | MS1 verified by standard               | No          |
| Identification level            | Species level                     | MS2 verified by standard               | No          |
| Polarity mode                   | Positive                          | Background check at MS1                | Yes         |
| Type of positive (precursor)ion | [M+NH <sub>4</sub> ] <sup>+</sup> | Background check at MS2                | No          |
| How many fragments used for ID  | 3 fragments                       | Check isomer overlap                   | No          |
| Fragment ion 1                  | NL[FA1-H+NH <sub>4</sub> ]        | Lipid Identification Software          | LipidSearch |
| Fragment ion 2                  | NL[FA2-H+NH <sub>4</sub> ]        | Nomenclature for intact lipid molecule | Yes         |
| Fragment ion 3                  | NL[FA3-H+NH <sub>4</sub> ]        | Nomenclature for fragment ions         | N/A         |
| Isotope correction at MS1       | No                                |                                        |             |

## Lipid class TG[M+NH<sub>4</sub>]<sup>+</sup> / For additional separation methods/analytical dimension

|                            |                          |                               |             |
|----------------------------|--------------------------|-------------------------------|-------------|
| Quantitative               | Yes                      | Limit of quantification       | No          |
| Internal lipid standard(s) | TG<br>(15:0/15:0/15:0)   | Normalization to reference    | No          |
| Type of quantification     | Internal standard amount | Lipid Quantification Software | TraceFinder |
| Response correction        | No                       | Batch correction              | No          |
| Type I isotope correction  | No                       |                               |             |

## Lipid class PE[M-H]<sup>-</sup> / Lipid identification

|                                 |                    |                                        |             |
|---------------------------------|--------------------|----------------------------------------|-------------|
| Lipid class                     | PE                 | MS1 verified by standard               | No          |
| MS Level                        | MS1, MS2           | MS2 verified by standard               | No          |
| Identification level            | Species level      | Background check at MS1                | Yes         |
| Polarity mode                   | Negative           | Background check at MS2                | No          |
| Type of negative (precursor)ion | [M-H] <sup>-</sup> | Check isomer overlap                   | No          |
| How many fragments used for ID  | 1 fragment         | Lipid Identification Software          | LipidSearch |
| Fragment ion 1                  | FA-H m/z           | Nomenclature for intact lipid molecule | Yes         |
| Isotope correction at MS1       | No                 | Nomenclature for fragment ions         | N/A         |
| Isotope correction at MS2       | No                 |                                        |             |

### Lipid class PE[M-H]- / For additional separation methods/analytical dimension

|                            |                          |                               |             |
|----------------------------|--------------------------|-------------------------------|-------------|
| Quantitative               | Yes                      | Limit of quantification       | No          |
| Internal lipid standard(s) | PE (15:0/15:0)           | Normalization to reference    | No          |
| Type of quantification     | Internal standard amount | Lipid Quantification Software | TraceFinder |
| Response correction        | No                       | Batch correction              | No          |
| Type I isotope correction  | No                       |                               |             |

### Lipid class PE[M+H]+ / Lipid identification

|                                 |               |                                        |             |
|---------------------------------|---------------|----------------------------------------|-------------|
| Lipid class                     | PE            | MS1 verified by standard               | No          |
| MS Level                        | MS1, MS2      | MS2 verified by standard               | No          |
| Identification level            | Species level | Background check at MS1                | Yes         |
| Polarity mode                   | Positive      | Background check at MS2                | No          |
| Type of positive (precursor)ion | [M+H]+        | Check isomer overlap                   | No          |
| How many fragments used for ID  | 1 fragment    | Lipid Identification Software          | LipidSearch |
| Fragment ion 1                  | NL 141.0191   | Nomenclature for intact lipid molecule | Yes         |
| Isotope correction at MS1       | No            | Nomenclature for fragment ions         | N/A         |
| Isotope correction at MS2       | No            |                                        |             |

### Lipid class PE[M+H]+ / For additional separation methods/analytical dimension

|                            |    |                  |    |
|----------------------------|----|------------------|----|
| Quantitative               | No | Batch correction | No |
| Normalization to reference | No |                  |    |

### Lipid class LPC[M+H]+ / Lipid identification

|                                 |                         |                                        |             |
|---------------------------------|-------------------------|----------------------------------------|-------------|
| Lipid class                     | LPC                     | MS1 verified by standard               | No          |
| MS Level                        | MS1, MS2                | MS2 verified by standard               | No          |
| Identification level            | Molecular species level | Background check at MS1                | Yes         |
| Polarity mode                   | Positive                | Background check at MS2                | No          |
| Type of positive (precursor)ion | [M+H]+                  | Check isomer overlap                   | No          |
| How many fragments used for ID  | 1 fragment              | Lipid Identification Software          | LipidSearch |
| Fragment ion 1                  | m/z 184.0733            | Nomenclature for intact lipid molecule | Yes         |
| Isotope correction at MS1       | No                      | Nomenclature for fragment ions         | N/A         |
| Isotope correction at MS2       | No                      |                                        |             |

### Lipid class LPC[M+H]+ / For additional separation methods/analytical dimension

|                            |                          |                               |             |
|----------------------------|--------------------------|-------------------------------|-------------|
| Quantitative               | Yes                      | Limit of quantification       | No          |
| Internal lipid standard(s) | LPC 15:0; LPC 19:0       | Normalization to reference    | No          |
| Type of quantification     | Internal standard amount | Lipid Quantification Software | TraceFinder |
| Response correction        | No                       | Batch correction              | No          |
| Type I isotope correction  | No                       |                               |             |

## Lipid class LPE[M+H]<sup>+</sup> / Lipid identification

|                                 |                         |                                        |             |
|---------------------------------|-------------------------|----------------------------------------|-------------|
| Lipid class                     | LPE                     | MS1 verified by standard               | No          |
| MS Level                        | MS1, MS2                | MS2 verified by standard               | No          |
| Identification level            | Molecular species level | Background check at MS1                | Yes         |
| Polarity mode                   | Positive                | Background check at MS2                | No          |
| Type of positive (precursor)ion | [M+H] <sup>+</sup>      | Check isomer overlap                   | No          |
| How many fragments used for ID  | 1 fragment              | Lipid Identification Software          | LipidSearch |
| Fragment ion 1                  | NL 141.0191             | Nomenclature for intact lipid molecule | Yes         |
| Isotope correction at MS1       | No                      | Nomenclature for fragment ions         | N/A         |
| Isotope correction at MS2       | No                      |                                        |             |

## Lipid class LPE[M+H]<sup>+</sup> / For additional separation methods/analytical dimension

|                            |                          |                               |             |
|----------------------------|--------------------------|-------------------------------|-------------|
| Quantitative               | Yes                      | Limit of quantification       | No          |
| Internal lipid standard(s) | LPC 15:0; LPC 19:0       | Normalization to reference    | No          |
| Type of quantification     | Internal standard amount | Lipid Quantification Software | TraceFinder |
| Response correction        | No                       | Batch correction              | No          |
| Type I isotope correction  | No                       |                               |             |

## Lipid class PG[M-H]<sup>-</sup> / Lipid identification

|                                 |                         |                                        |          |
|---------------------------------|-------------------------|----------------------------------------|----------|
| Lipid class                     | PG                      | MS1 verified by standard               | No       |
| MS Level                        | MS1                     | Background check at MS1                | Yes      |
| Identification level            | Molecular species level | Check isomer overlap                   | No       |
| Polarity mode                   | Negative                | Lipid Identification Software          | Xcalibur |
| Type of negative (precursor)ion | [M-H] <sup>-</sup>      | Nomenclature for intact lipid molecule | Yes      |
| Isotope correction at MS1       | No                      |                                        |          |

## Lipid class PG[M-H]<sup>-</sup> / For additional separation methods/analytical dimension

|                            |                          |                               |             |
|----------------------------|--------------------------|-------------------------------|-------------|
| Quantitative               | Yes                      | Limit of quantification       | No          |
| Internal lipid standard(s) | PG (15:0/15:0)           | Normalization to reference    | No          |
| Type of quantification     | Internal standard amount | Lipid Quantification Software | TraceFinder |
| Response correction        | No                       | Batch correction              | No          |
| Type I isotope correction  | No                       |                               |             |

## Lipid class Cer[M+H]<sup>+</sup> / Lipid identification

|                                 |                                       |                                        |             |
|---------------------------------|---------------------------------------|----------------------------------------|-------------|
| Lipid class                     | Cer                                   | MS1 verified by standard               | No          |
| MS Level                        | MS1, MS2                              | MS2 verified by standard               | No          |
| Identification level            | Species level                         | Background check at MS1                | Yes         |
| Polarity mode                   | Positive                              | Background check at MS2                | No          |
| Type of positive (precursor)ion | [M+H] <sup>+</sup>                    | Check isomer overlap                   | No          |
| How many fragments used for ID  | 1 fragment                            | Lipid Identification Software          | LipidSearch |
| Fragment ion 1                  | Long chain base specific product ions | Nomenclature for intact lipid molecule | Yes         |
| Isotope correction at MS1       | No                                    | Nomenclature for fragment ions         | N/A         |
| Isotope correction at MS2       | No                                    |                                        |             |

## Lipid class Cer[M+H]<sup>+</sup> / For additional separation methods/analytical dimension

|                            |                          |                               |             |
|----------------------------|--------------------------|-------------------------------|-------------|
| Quantitative               | Yes                      | Limit of quantification       | No          |
| Internal lipid standard(s) | Cer(d18:1/17:0)          | Normalization to reference    | No          |
| Type of quantification     | Internal standard amount | Lipid Quantification Software | TraceFinder |
| Response correction        | No                       | Batch correction              | No          |
| Type I isotope correction  | No                       |                               |             |

## Lipid class Cer[M+H-H<sub>2</sub>O]<sup>+</sup> / Lipid identification

|                                 |                                       |                                        |             |
|---------------------------------|---------------------------------------|----------------------------------------|-------------|
| Lipid class                     | Cer                                   | MS1 verified by standard               | No          |
| MS Level                        | MS1, MS2                              | MS2 verified by standard               | No          |
| Identification level            | Species level                         | Background check at MS1                | Yes         |
| Polarity mode                   | Positive                              | Background check at MS2                | No          |
| Type of positive (precursor)ion | [M+H-H <sub>2</sub> O] <sup>+</sup>   | Check isomer overlap                   | No          |
| How many fragments used for ID  | 1 fragment                            | Lipid Identification Software          | LipidSearch |
| Fragment ion 1                  | Long chain base specific product ions | Nomenclature for intact lipid molecule | Yes         |
| Isotope correction at MS1       | No                                    | Nomenclature for fragment ions         | N/A         |
| Isotope correction at MS2       | No                                    |                                        |             |

## Lipid class Cer[M+H-H<sub>2</sub>O]<sup>+</sup> / For additional separation methods/analytical dimension

|                            |                          |                               |             |
|----------------------------|--------------------------|-------------------------------|-------------|
| Quantitative               | Yes                      | Limit of quantification       | No          |
| Internal lipid standard(s) | Cer(d18:1/17:0)          | Normalization to reference    | No          |
| Type of quantification     | Internal standard amount | Lipid Quantification Software | TraceFinder |
| Response correction        | No                       | Batch correction              | No          |
| Type I isotope correction  | No                       |                               |             |

## Lipid class HexCer[M+H]<sup>+</sup> / Lipid identification

|                                 |                                       |                                        |             |
|---------------------------------|---------------------------------------|----------------------------------------|-------------|
| Lipid class                     | HexCer                                | MS1 verified by standard               | No          |
| MS Level                        | MS1, MS2                              | MS2 verified by standard               | No          |
| Identification level            | Molecular species level               | Background check at MS1                | Yes         |
| Polarity mode                   | Positive                              | Background check at MS2                | No          |
| Type of positive (precursor)ion | [M+H] <sup>+</sup>                    | Check isomer overlap                   | No          |
| How many fragments used for ID  | 1 fragment                            | Lipid Identification Software          | LipidSearch |
| Fragment ion 1                  | Long chain base specific product ions | Nomenclature for intact lipid molecule | Yes         |
| Isotope correction at MS1       | No                                    | Nomenclature for fragment ions         | N/A         |
| Isotope correction at MS2       | No                                    |                                        |             |

## Lipid class HexCer[M+H]<sup>+</sup> / For additional separation methods/analytical dimension

|                            |                          |                               |             |
|----------------------------|--------------------------|-------------------------------|-------------|
| Quantitative               | Yes                      | Limit of quantification       | No          |
| Internal lipid standard(s) | Cer(d18:1/17:0)          | Normalization to reference    | No          |
| Type of quantification     | Internal standard amount | Lipid Quantification Software | TraceFinder |
| Response correction        | No                       | Batch correction              | No          |
| Type I isotope correction  | No                       |                               |             |

## Lipid class HexCer[M+H-H<sub>2</sub>O]<sup>+</sup> / Lipid identification

|                                 |                                       |                                        |             |
|---------------------------------|---------------------------------------|----------------------------------------|-------------|
| Lipid class                     | HexCer                                | MS1 verified by standard               | No          |
| MS Level                        | MS1, MS2                              | MS2 verified by standard               | No          |
| Identification level            | Molecular species level               | Background check at MS1                | Yes         |
| Polarity mode                   | Positive                              | Background check at MS2                | No          |
| Type of positive (precursor)ion | [M+H-H <sub>2</sub> O] <sup>+</sup>   | Check isomer overlap                   | No          |
| How many fragments used for ID  | 1 fragment                            | Lipid Identification Software          | LipidSearch |
| Fragment ion 1                  | Long chain base specific product ions | Nomenclature for intact lipid molecule | Yes         |
| Isotope correction at MS1       | No                                    | Nomenclature for fragment ions         | N/A         |
| Isotope correction at MS2       | No                                    |                                        |             |

## Lipid class HexCer[M+H-H<sub>2</sub>O]<sup>+</sup> / For additional separation methods/analytical dimension

|                            |                          |                               |             |
|----------------------------|--------------------------|-------------------------------|-------------|
| Quantitative               | Yes                      | Limit of quantification       | No          |
| Internal lipid standard(s) | Cer(d18:1/17:0)          | Normalization to reference    | No          |
| Type of quantification     | Internal standard amount | Lipid Quantification Software | TraceFinder |
| Response correction        | No                       | Batch correction              | No          |
| Type I isotope correction  | No                       |                               |             |



## Lipid class SM[M+H]<sup>+</sup> / Lipid identification

|                                 |                    |                                        |             |
|---------------------------------|--------------------|----------------------------------------|-------------|
| Lipid class                     | SM                 | MS1 verified by standard               | No          |
| MS Level                        | MS1, MS2           | MS2 verified by standard               | No          |
| Identification level            | Species level      | Background check at MS1                | Yes         |
| Polarity mode                   | Positive           | Background check at MS2                | No          |
| Type of positive (precursor)ion | [M+H] <sup>+</sup> | Check isomer overlap                   | No          |
| How many fragments used for ID  | 1 fragment         | Lipid Identification Software          | LipidSearch |
| Fragment ion 1                  | m/z 184.0733       | Nomenclature for intact lipid molecule | Yes         |
| Isotope correction at MS1       | No                 | Nomenclature for fragment ions         | N/A         |
| Isotope correction at MS2       | No                 |                                        |             |

## Lipid class SM[M+H]<sup>+</sup> / For additional separation methods/analytical dimension

|                            |                          |                               |             |
|----------------------------|--------------------------|-------------------------------|-------------|
| Quantitative               | Yes                      | Limit of quantification       | No          |
| Internal lipid standard(s) | SM (d18:1/12:0)          | Normalization to reference    | No          |
| Type of quantification     | Internal standard amount | Lipid Quantification Software | TraceFinder |
| Response correction        | No                       | Batch correction              | No          |
| Type I isotope correction  | No                       |                               |             |

## Lipid class SE[M+NH4]<sup>+</sup> / Lipid identification

|                                 |                         |                                        |          |
|---------------------------------|-------------------------|----------------------------------------|----------|
| Lipid class                     | SE                      | MS1 verified by standard               | No       |
| MS Level                        | MS1                     | Background check at MS1                | Yes      |
| Identification level            | Molecular species level | Check isomer overlap                   | No       |
| Polarity mode                   | Positive                | Lipid Identification Software          | Xcalibur |
| Type of positive (precursor)ion | [M+NH4] <sup>+</sup>    | Nomenclature for intact lipid molecule | Yes      |
| Isotope correction at MS1       | No                      |                                        |          |

## Lipid class SE[M+NH4]<sup>+</sup> / For additional separation methods/analytical dimension

|                            |                                           |                               |             |
|----------------------------|-------------------------------------------|-------------------------------|-------------|
| Quantitative               | Yes                                       | Limit of quantification       | No          |
| Internal lipid standard(s) | Cer (d18:1/17:0); DG (15:0/18:1); PC 30:0 | Normalization to reference    | No          |
| Type of quantification     | Internal standard amount                  | Lipid Quantification Software | TraceFinder |
| Response correction        | No                                        | Batch correction              | No          |
| Type I isotope correction  | No                                        |                               |             |

### Lipid class PC[M+H]<sup>+</sup> / Lipid identification

|                                 |                    |                                        |             |
|---------------------------------|--------------------|----------------------------------------|-------------|
| Lipid class                     | PC                 | MS1 verified by standard               | No          |
| MS Level                        | MS1, MS2           | MS2 verified by standard               | No          |
| Identification level            | Species level      | Background check at MS1                | Yes         |
| Polarity mode                   | Positive           | Background check at MS2                | No          |
| Type of positive (precursor)ion | [M+H] <sup>+</sup> | Check isomer overlap                   | No          |
| How many fragments used for ID  | 1 fragment         | Lipid Identification Software          | LipidSearch |
| Fragment ion 1                  | m/z 184.0733       | Nomenclature for intact lipid molecule | Yes         |
| Isotope correction at MS1       | No                 | Nomenclature for fragment ions         | N/A         |
| Isotope correction at MS2       | No                 |                                        |             |

### Lipid class PC[M+H]<sup>+</sup> / For additional separation methods/analytical dimension

|                            |                                |                               |             |
|----------------------------|--------------------------------|-------------------------------|-------------|
| Quantitative               | Yes                            | Limit of quantification       | No          |
| Internal lipid standard(s) | PC (15:0/15:0); PC (19:0/19:0) | Normalization to reference    | No          |
| Type of quantification     | Internal standard amount       | Lipid Quantification Software | TraceFinder |
| Response correction        | No                             | Batch correction              | No          |
| Type I isotope correction  | No                             |                               |             |

### Lipid class PC[M+CH<sub>3</sub>COO]<sup>-</sup> / Lipid identification

|                                 |                                      |                                        |             |
|---------------------------------|--------------------------------------|----------------------------------------|-------------|
| Lipid class                     | PC                                   | MS1 verified by standard               | No          |
| MS Level                        | MS1, MS2                             | MS2 verified by standard               | No          |
| Identification level            | Species level                        | Background check at MS1                | Yes         |
| Polarity mode                   | Negative                             | Background check at MS2                | No          |
| Type of negative (precursor)ion | [M+CH <sub>3</sub> COO] <sup>-</sup> | Check isomer overlap                   | No          |
| How many fragments used for ID  | 1 fragment                           | Lipid Identification Software          | LipidSearch |
| Fragment ion 1                  | FA-H m/z                             | Nomenclature for intact lipid molecule | Yes         |
| Isotope correction at MS1       | No                                   | Nomenclature for fragment ions         | N/A         |
| Isotope correction at MS2       | No                                   |                                        |             |

### Lipid class PC[M+CH<sub>3</sub>COO]<sup>-</sup> / For additional separation methods/analytical dimension

|                            |    |                  |    |
|----------------------------|----|------------------|----|
| Quantitative               | No | Batch correction | No |
| Normalization to reference | No |                  |    |

## Lipid class PI[M-H]- / Lipid identification

|                                 |               |                                        |             |
|---------------------------------|---------------|----------------------------------------|-------------|
| Lipid class                     | PI            | Isotope correction at MS2              | No          |
| MS Level                        | MS1, MS2      | MS1 verified by standard               | No          |
| Identification level            | Species level | MS2 verified by standard               | No          |
| Polarity mode                   | Negative      | Background check at MS1                | Yes         |
| Type of negative (precursor)ion | [M-H]-        | Background check at MS2                | No          |
| How many fragments used for ID  | 2 fragments   | Check isomer overlap                   | No          |
| Fragment ion 1                  | m/z 241.0122  | Lipid Identification Software          | LipidSearch |
| Fragment ion 2                  | FA-H m/z      | Nomenclature for intact lipid molecule | Yes         |
| Isotope correction at MS1       | No            | Nomenclature for fragment ions         | N/A         |

## Lipid class PI[M-H]- / For additional separation methods/analytical dimension

|                            |                          |                               |             |
|----------------------------|--------------------------|-------------------------------|-------------|
| Quantitative               | Yes                      | Limit of quantification       | No          |
| Internal lipid standard(s) | PG (15:0/15:0)           | Normalization to reference    | No          |
| Type of quantification     | Internal standard amount | Lipid Quantification Software | TraceFinder |
| Response correction        | No                       | Batch correction              | No          |
| Type I isotope correction  | No                       |                               |             |
